# Supplementary material for: Low-Rank and Sparse Matrix Decomposition for Genetic Interaction Data
Source: Hindawi journal article supplement (doi:10.1155/2015/573956), 2015-01-01
Supplement: f1 [file 573956.f1.pdf]

# Supplementary Document of “Low Rank and Sparse Matrix Decomposition for Genetic Interaction Data”

Yishu Wang, Dejie Yang, Minghua Deng

January 8, 2015

## 1 Algorithm convergence analysis

In this section we study the convergence properties of Algorithm LRSDec. Firstly, we define the objective value (decomposition error) is  $\|\mathbf{X} - \mathbf{L} - \mathbf{S}\|_F^2$ . We have the following lemma about the convergence of the objective value  $\|\mathbf{X} - \mathbf{L} - \mathbf{S}\|_F^2$  in (7).

**Lemma 2.** (*Convergence of objective value*) The alternative optimization (7) produces a sequence of  $\|\mathbf{X} - \mathbf{L} - \mathbf{S}\|_F^2$  that converges to a local minimum.

*Proof.* Let the objective value  $\|\mathbf{X} - \mathbf{L} - \mathbf{S}\|_F^2$  after solving the two subproblems in (7) be  $E_t^1$  and  $E_t^2$ , respectively, in the  $t^{th}$  iteration. On one hand, we have:

$$E_t^1 = \|\mathbf{X} - \mathbf{L}_t - \mathbf{S}_{t-1}\|_F^2, E_t^2 = \|\mathbf{X} - \mathbf{L}_t - \mathbf{S}_t\|_F^2 \quad (1)$$

The global optimality of  $\mathbf{S}_t$  yields  $E_t^1 \geq E_t^2$ . On the other hand,

$$E_t^2 = \|\mathbf{X} - \mathbf{L}_t - \mathbf{S}_{t-1}\|_F^2, E_{t+1}^1 = \|\mathbf{X} - \mathbf{L}_{t+1} - \mathbf{S}_t\|_F^2 \quad (2)$$

The global optimality of  $\mathbf{L}_{t+1}$  yields  $E_t^2 \geq E_{t+1}^1$ . Therefore, the objective values (decomposition errors)  $\|\mathbf{X} - \mathbf{L} - \mathbf{S}\|_F^2$  keep decreasing throughout LRSDec (7):

$$E_1^1 \geq E_1^2 \geq E_2^1 \geq \dots \geq E_t^1 \geq E_t^2 \geq E_{t+1}^1 \geq \dots \quad (3)$$

Since the objective of (7) is monotonically decreasing and the constraints are satisfied all the time, the LRSDec algorithm produces a sequence of objective values that converge to a local minimum.

In Section 1.1, we will show that the sequence  $\mathbf{L}_t, \mathbf{S}_t$  generated via LRSDec converges asymptotically.

## 1.1 Asymptotic Convergence

**Lemma 3.** The nuclear norm shrinkage operator  $\mathbf{T}_\lambda(\cdot)$ , defined in Lemma 1 and card shrinkage operator  $\Lambda_k(\cdot)$ , defined in (13), satisfies the following for any  $\mathbf{W}_1, \mathbf{W}_2$  (with matching dimensions)

$$\|\mathbf{T}_\lambda(\mathbf{W}_1) - \mathbf{T}_\lambda(\mathbf{W}_2)\|_F^2 \leq \|\mathbf{W}_1 - \mathbf{W}_2\|_F^2$$

$$\|\Lambda_k(\mathbf{W}_1) - \Lambda_k(\mathbf{W}_2)\|_F^2 \leq \|\mathbf{W}_1 - \mathbf{W}_2\|_F^2$$

In particular this implies that  $\mathbf{T}_\lambda(\mathbf{W})$  and  $\Lambda_k(\mathbf{W})$  are continuous map in  $\mathbf{W}$ .

*Proof.* The continuity of nuclear norm shrinkage operator  $\mathbf{T}_\lambda(\cdot)$  has been proved in [2]. We give the proof of card shrinkage operator  $\Lambda_k(\cdot)$ .

$$\mathbf{W}_1 = \mathcal{P}_\Theta(\mathbf{W}_1) + \mathcal{P}_{\Theta^\perp}(\mathbf{W}_1), \mathbf{W}_2 = \mathcal{P}_\Theta(\mathbf{W}_2) + \mathcal{P}_{\Theta^\perp}(\mathbf{W}_2) \quad \Theta \cap \Theta^\perp = \emptyset$$

$$\begin{aligned} \|\mathbf{W}_1 - \mathbf{W}_2\|_F^2 &= \|\mathcal{P}_\Theta(\mathbf{W}_1) - \mathcal{P}_\Theta(\mathbf{W}_2) + \mathcal{P}_{\Theta^\perp}(\mathbf{W}_1) - \mathcal{P}_{\Theta^\perp}(\mathbf{W}_2)\|_F^2 \\ &= \|\mathcal{P}_\Theta(\mathbf{W}_1) - \mathcal{P}_\Theta(\mathbf{W}_2)\|_F^2 + \|\mathcal{P}_{\Theta^\perp}(\mathbf{W}_1) - \mathcal{P}_{\Theta^\perp}(\mathbf{W}_2)\|_F^2 \\ &= \|\Lambda_k(\mathbf{W}_1) - \Lambda_k(\mathbf{W}_2)\|_F^2 + \|\mathcal{P}_{\Theta^\perp}(\mathbf{W}_1) - \mathcal{P}_{\Theta^\perp}(\mathbf{W}_2)\|_F^2 \\ &\geq \|\Lambda_k(\mathbf{W}_1) - \Lambda_k(\mathbf{W}_2)\|_F^2 \end{aligned}$$

**Lemma 4.** The successive differences  $\|\mathbf{L}_t - \mathbf{L}_{t-1}\|_F^2, \|\mathbf{S}_t - \mathbf{S}_{t-1}\|_F^2$  of the sequence  $\mathbf{L}_t, \mathbf{S}_t$  are monotone decreasing:

$$\begin{aligned} \|\mathbf{L}_{t+1} - \mathbf{L}_t\|_F^2 &\leq \|\mathbf{L}_t - \mathbf{L}_{t-1}\|_F^2 \quad \forall t. \\ \|\mathbf{S}_{t+1} - \mathbf{S}_t\|_F^2 &\leq \|\mathbf{S}_t - \mathbf{S}_{t-1}\|_F^2 \quad \forall t. \end{aligned}$$

*Proof.*

$$\begin{aligned} \|\mathbf{L}_{t+1} - \mathbf{L}_t\|_F^2 &= \|\mathbf{T}_\lambda(\mathbf{X} - \mathbf{S}_t) - \mathbf{T}_\lambda(\mathbf{X} - \mathbf{S}_{t-1})\|_F^2 \\ &\text{(by Lemma 3)} \leq \|(\mathbf{X} - \mathbf{S}_t) - (\mathbf{X} - \mathbf{S}_{t-1})\|_F^2 \\ &= \|\mathbf{S}_{t-1} - \mathbf{S}_t\|_F^2 \\ &= \|\Lambda_k(\mathbf{X} - \mathbf{L}_{t-1}) - \Lambda_k(\mathbf{X} - \mathbf{L}_t)\|_F^2 \\ &\text{(by Lemma 3)} \leq \|\mathbf{L}_t - \mathbf{L}_{t-1}\|_F^2 \end{aligned}$$

In the same way for sequence  $\mathbf{S}_t$ :

$$\begin{aligned} \|\mathbf{S}_{t+1} - \mathbf{S}_t\|_F^2 &= \|\Lambda_k(\mathbf{X} - \mathbf{L}_{t+1}) - \Lambda_k(\mathbf{X} - \mathbf{L}_t)\|_F^2 \\ &\leq \|\mathbf{L}_t - \mathbf{L}_{t+1}\|_F^2 \\ &= \|\mathbf{T}_\lambda(\mathbf{X} - \mathbf{S}_{t-1}) - \mathbf{T}_\lambda(\mathbf{X} - \mathbf{S}_t)\|_F^2 \\ &\leq \|\mathbf{S}_t - \mathbf{S}_{t-1}\|_F^2 \end{aligned}$$

The above implies that sequence  $\|\mathbf{L}_t - \mathbf{L}_{t-1}\|_F^2$  and  $\|\mathbf{S}_t - \mathbf{S}_{t-1}\|_F^2$  converge (since they are decreasing and bounded below). This implies that:

$$\|\mathbf{L}_{t+1} - \mathbf{L}_t\|_F^2 - \|\mathbf{L}_t - \mathbf{L}_{t-1}\|_F^2 \rightarrow 0 \quad as \quad t \rightarrow \infty$$

$$\|\mathbf{S}_{t+1} - \mathbf{S}_t\|_F^2 - \|\mathbf{S}_t - \mathbf{S}_{t-1}\|_F^2 \rightarrow 0 \quad as \quad t \rightarrow \infty$$

So there exist constants  $\alpha_1 \geq 0, \alpha_2 \geq 0$

$$\|\mathbf{L}_{t+1} - \mathbf{L}_t\|_F^2 \rightarrow \alpha_1 \quad as \quad t \rightarrow \infty$$

$$\|\mathbf{S}_{t+1} - \mathbf{S}_t\|_F^2 \rightarrow \alpha_2 \quad as \quad t \rightarrow \infty$$

Actually, since LRSDec can be written as the form of alternating projections on two manifolds. According to [1],  $\mathbf{L}_t$  converges asymptotically to some point  $\mathbf{L}_*$ ,  $\mathbf{S}_t$  converges linearly to some point  $\mathbf{S}_*$ , for some constant  $\alpha$ , exists  $\beta$ :

$$\|\mathbf{L}_t - \mathbf{L}_*\|_F^2 \leq \alpha_1 \beta_1^t$$

$$\|\mathbf{S}_t - \mathbf{S}_*\|_F^2 \leq \alpha_2 \beta_2^t$$



### 3 Calculation of $p$ -value for a gene set

Let  $N$  be the total number of genes and  $M$  be the number of genes related to a functional category from the total genes. Suppose now we have a gene set with  $N_1$  genes. Among these  $N_1$  genes there are  $M_1$  genes related to GO functional category. The  $p$ -value of this gene set is given below:

$$p(N, M, N_1, M_1) = \sum_{i=M_1}^{N_1} \frac{\binom{M}{i} \binom{N-M}{N-i}}{\binom{N}{N_1}}$$

The  $p$ -value are adjusted using Bonferroni correction.

### 4 Jaccard index: evaluation measure of the predicted modules

The Jaccard index [3] between two sets  $M_i$  and  $B_j$  is defined as:

$$\frac{\sharp\{M_i \cap B_j\}}{\sharp\{M_i \cup B_j\}} \quad (4)$$

where  $\sharp\{A\}$  denotes the number of set  $A$

For module  $M_i$ , the Jaccard index between  $M_i$  and each gene set  $B_j$  in the benchmark is computed, and the Jaccard index of  $M_i$  and the benchmark gene sets is defined as the maximum of Jaccard index between  $M_i$  and any gene set in the benchmark:

$$Jaccard\ Index(M_i, B) = \max_j \{JaccardIndex(M_i, B_j)\} \quad (5)$$

Thus, the average Jaccard index of the predicted modules and the benchmark gene sets can be computed as:

$$Jaccard\ Index(M, B) = \frac{\sum_{i \in 1, \dots, k} Jaccard\ Index(M_i, B)}{k} \quad (6)$$

## 5 Results in Strategy 2

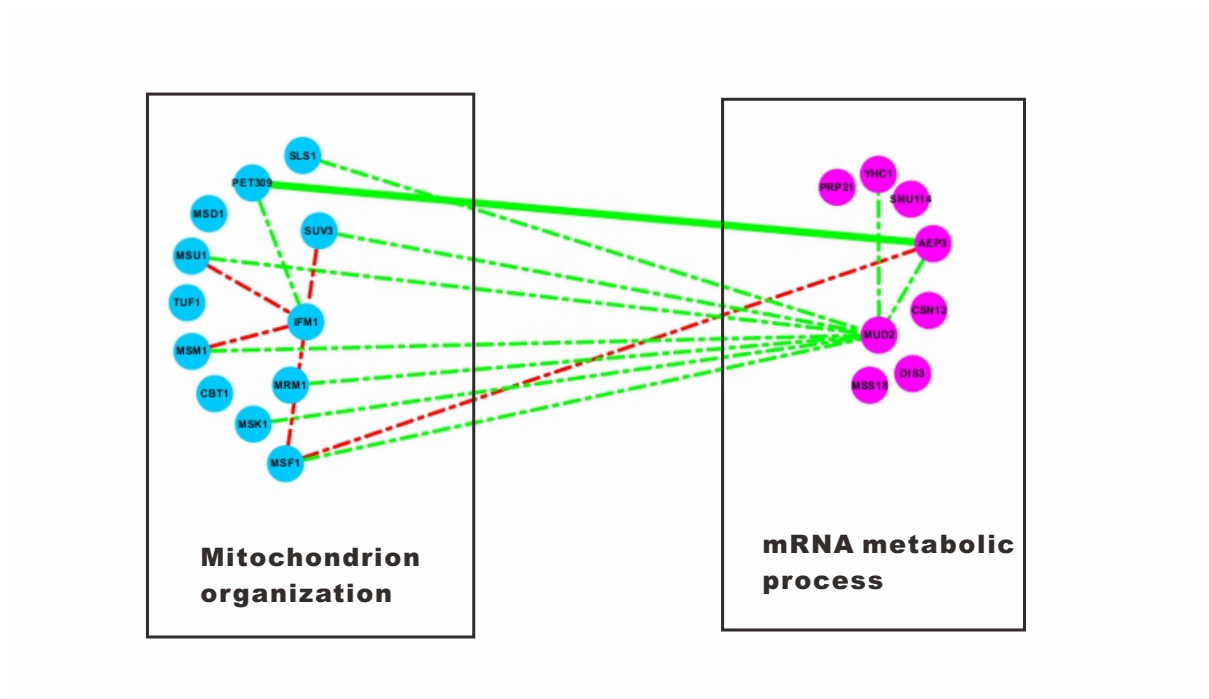

Figure 2: Global

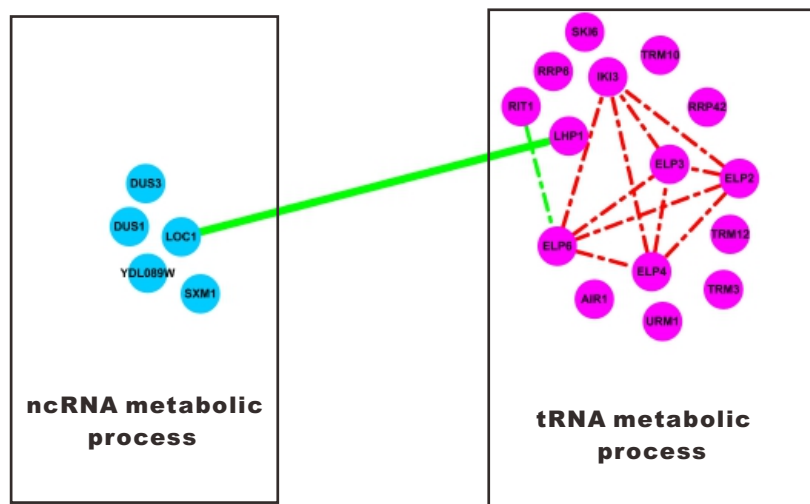

Figure 3: Global

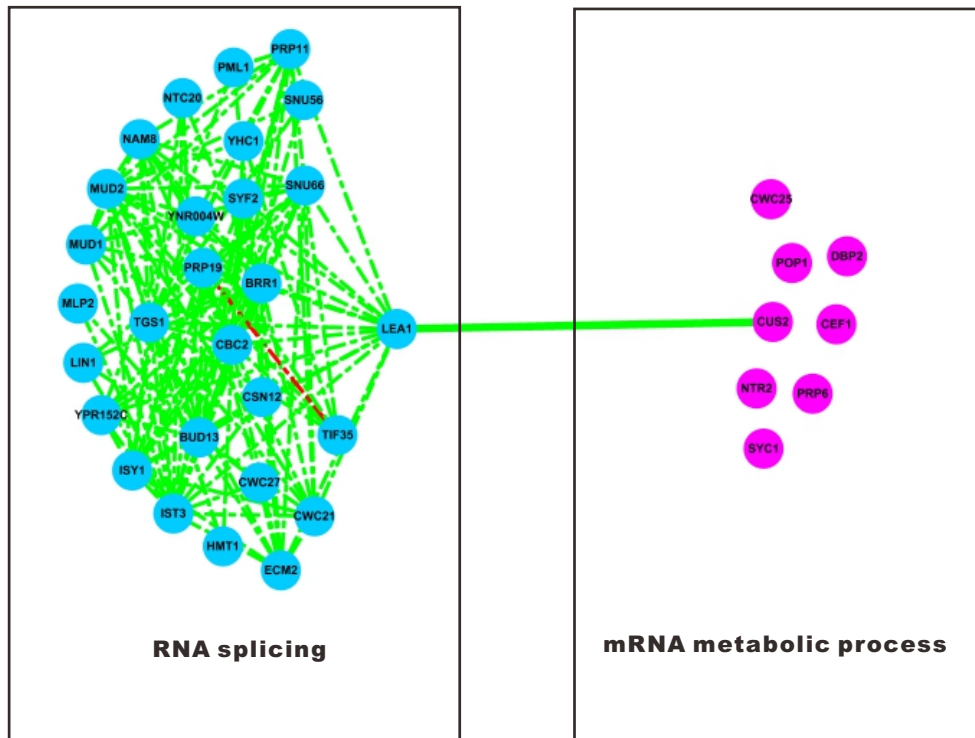

Figure 4: Global

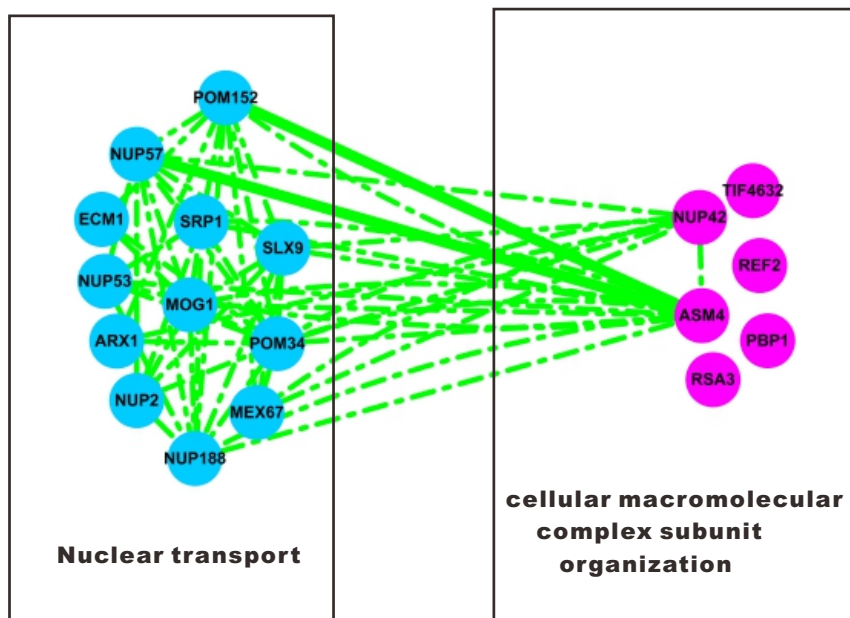

Figure 5: Global

## 6 Results in Synthetic data

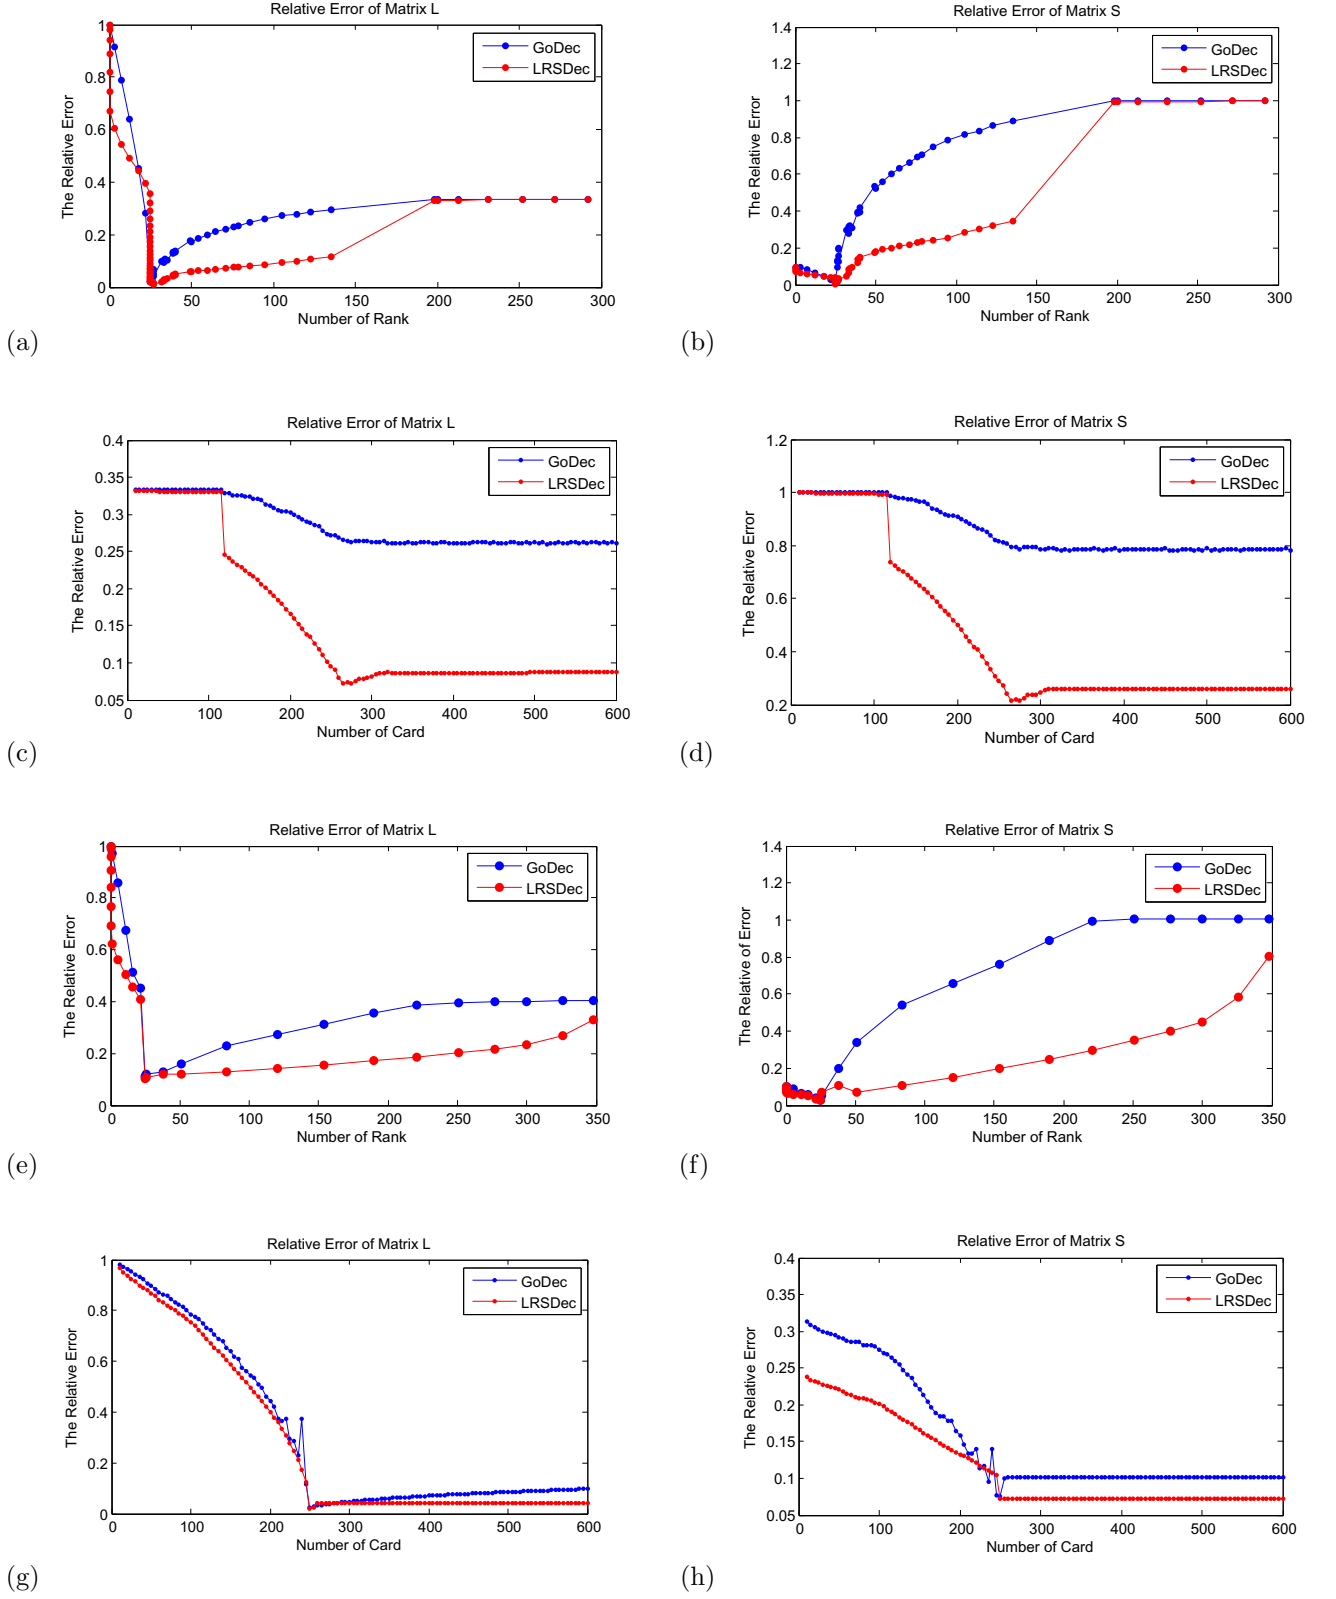

Figure 6: Performances of LRSDec and GoDec in Low-Rank and Sparse decomposition tasks on synthetic data under different parameters. (a)-(d): noise  $\mathbf{e} = 10^{-3} * \mathbf{F}$ , specially, (a)-(b): fixed parameter card, different parameter rank; (c)-(d): fixed parameter rank, different parameter card. And (e)-(h): noise  $\mathbf{e} = 10^{-1} * \mathbf{F}$ , specially, (e)-(f): fixed parameter card, different parameter rank; (g)-(h): fixed parameter rank, different parameter card.



## References

- [1] Adrian S Lewis and Jérôme Malick. Alternating projections on manifolds. *Mathematics of Operations Research*, 33(1):216–234, 2008.
- [2] Rahul Mazumder, Trevor Hastie, and Robert Tibshirani. Spectral regularization algorithms for learning large incomplete matrices. *The Journal of Machine Learning Research*, 99:2287–2322, 2010.
- [3] Jimin Song and Mona Singh. How and when should interactome-derived clusters be used to predict functional modules and protein function? *Bioinformatics*, 25(23):3143–3150, 2009.
- [4] Gwendolyn M Wilmes, Megan Bergkessel, Sourav Bandyopadhyay, Michael Shales, Hannes Braberg, Gerard Cagney, Sean R Collins, Gregg B Whitworth, Tracy L Kress, Jonathan S Weissman, et al. A genetic interaction map of rna-processing factors reveals links between sem1/dss1-containing complexes and mrna export and splicing. *Molecular cell*, 32(5):735–746, 2008.
