# Supplementary material for: Low-Rank and Sparse Matrix Decomposition for Genetic Interaction Data
Source: Biomed Res Int. 2015 Jul 26;2015:573956. doi: 10.1155/2015/573956 (PMC4529927; doi:10.1155/2015/573956)
Supplement: Supplementary file 2 [file 573956.f2.zip]

Archive with 18 entries (16 files):
- 573956.f2/
- 573956.f2/Supplementary materials/
- 573956.f2/Supplementary materials/106-CUS.eps
- 573956.f2/Supplementary materials/123-ASM.eps
- 573956.f2/Supplementary materials/27-AEP.eps
- 573956.f2/Supplementary materials/71-LHP.eps
- 573956.f2/Supplementary materials/complexlljiang.eps
- 573956.f2/Supplementary materials/Err_card_001e_L.eps
- 573956.f2/Supplementary materials/Err_card_001e_S.eps
- 573956.f2/Supplementary materials/Err_card_01e_L.eps
- 573956.f2/Supplementary materials/Err_card_01e_S.eps
- 573956.f2/Supplementary materials/Err_rank_001e_L.eps
- 573956.f2/Supplementary materials/Err_rank_001e_S.eps
- 573956.f2/Supplementary materials/Err_rank_01e_L.eps
- 573956.f2/Supplementary materials/Err_rank_01e_S.eps
- 573956.f2/Supplementary materials/Low-Sparse_planlatex-Supplementary.pdf
- 573956.f2/Supplementary materials/Low-Sparse_planlatex-Supplementary.tex
- 573956.f2/Supplementary materials/New-Cluster.eps
