# Supplementary material for: Low-Rank and Sparse Matrix Decomposition for Genetic Interaction Data
Source: Biomed Res Int. 2015 Jul 26;2015:573956. doi: 10.1155/2015/573956 (PMC4529927; doi:10.1155/2015/573956)
Supplement: Supplementary file 2 [file 573956.f2.zip › 573956.f2/Supplementary materials/Low-Sparse_planlatex-Supplementary.tex]

\documentclass[a4paper]{article}
%\usepackage{amsmath,amssymb,amsfonts,latexsym,graphicx}
\usepackage[dvips]{color}
\usepackage{slashbox}
\usepackage[top=1in, bottom=1in, left=1in, right=1in]{geometry}
%\usepackage{natbib}
\usepackage{color}
%\usepackage{amssymb}

\usepackage{graphics}
\usepackage{amssymb}
\usepackage{amsmath}
\usepackage[figuresright]{rotating}
\usepackage{float}
%\usepackage{subfigure}
\usepackage{subfig}
%\usepackage{subfigure}
\usepackage{array}
\usepackage{threeparttable}
\usepackage{longtable}
%\usepackage{rotating}
\usepackage{multirow}
\usepackage{makecell}
\usepackage{natbib}
\usepackage{array}

\parindent=0mm
%\textheight=20cm \textwidth=14cm
\parskip=1.1mm
\renewcommand\baselinestretch{1.1}
%\oddsidemargin30pt \evensidemargin30pt

\def\pd#1#2{\frac{\partial #1}{\partial #2}}
\renewcommand{\vec}[1]{\mbox{\boldmath \small $#1$}}
\linespread{1.5}


\title{Supplementary Document of ``Low Rank and Sparse Matrix Decomposition for Genetic Interaction Data''}
\author{Yishu Wang, Dejie Yang, Minghua Deng}
\begin{document}
\maketitle

\section{Algorithm convergence analysis}

In this section we study the convergence properties of Algorithm LRSDec. Firstly, we define the objective value (decomposition error) is $\|\textbf{X} - \textbf{L} - \textbf{S}\|_F^2$. We have the following lemma about the convergence of the objective value $\|\textbf{X} - \textbf{L} - \textbf{S}\|_F^2$ in (7).
\\

\emph{\textbf{Lemma 2}. (Convergence of objective value)}
The alternative optimization (7) produces a sequence of $\|\textbf{X} - \textbf{L} - \textbf{S}\|_F^2$ that converges to a local minimum.
\\

\emph{Proof}. Let the objective value $\|\textbf{X} - \textbf{L} - \textbf{S}\|_F^2$ after solving the two subproblems in (7) be $E_t^1$ and $E_t^2$, respectively, in the $t^{th}$ iteration. On one hand, we have:
\begin{equation}
E_t^1=\|\textbf{X} - \textbf{L}_t - \textbf{S}_{t-1}\|_F^2, E_t^2=\|\textbf{X} - \textbf{L}_t - \textbf{S}_{t}\|_F^2
\end{equation}

The global optimality of $\textbf{S}_t$ yields $E_t^1 \geq E_t^2$. On the other hand,
\begin{equation}
E_t^2=\|\textbf{X} - \textbf{L}_t - \textbf{S}_{t-1}\|_F^2, E_{t+1}^1=\|\textbf{X} - \textbf{L}_{t+1} - \textbf{S}_{t}\|_F^2
\end{equation}

The global optimality of $L_{t+1}$ yields $E_t^2 \geq E_{t+1}^1$. Therefore, the objective values (decomposition errors) $\|\textbf{X} - \textbf{L} - \textbf{S}\|_F^2$ keep decreasing throughout LRSDec (7):
\begin{equation}
E_1^1 \geq E_1^2 \geq E_2^1 \geq ... \geq E_t^1 \geq E_t^2 \geq E_{t+1}^1 \geq ...
\end{equation}

Since the objective of (7) is monotonically decreasing and the constrains are satisfied all the time, the LRSDec algorithm produces a sequence of objective values that converge to a local minimum.\\

In Section 1.1, we will show that the sequence $\textbf{L}_t, \textbf{S}_t$ generated via LRSDec converges asymptotically.

\subsection{Asymptotic Convergence}
\emph{\textbf{Lemma 3}}. The nuclear norm shrinkage operator $\textbf{T}_\lambda(\cdot)$, defined in \emph{Lemma} 1 and card shrinkage operator $\Lambda_k(\cdot)$, defined in (13), satisfies the following for any $\textbf{W}_1, \textbf{W}_2$ (with matching dimensions)
\[\|\textbf{T}_\lambda(\textbf{W}_1)-\textbf{T}_\lambda(\textbf{W}_2)\|_F^2 \leq  \|\textbf{W}_1-\textbf{W}_2\|_F^2\]

\[\|\Lambda_k(\textbf{W}_1)-\Lambda_k(\textbf{W}_2))\|_F^2 \leq \|\textbf{W}_1-\textbf{W}_2\|_F^2 \]

In particular this implies that $\textbf{T}_\lambda(\textbf{W})$ and $\Lambda_k(\textbf{W})$ are continuous map in \textbf{W}.\\


\emph{Proof}.  The continuity of nuclear norm shrinkage operator $\textbf{T}_\lambda(\cdot)$ has been proved in \cite{mazumder2010spectral}. We give the proof of card shrinkage operator $\Lambda_k(\cdot)$.

\begin{align*}
\textbf{W}_1 = \mathcal{P}_\Theta(\textbf{W}_1)+\mathcal{P}_{\Theta^\perp}(\textbf{W}_1), \textbf{W}_2 = \mathcal{P}_\Theta(\textbf{W}_2)+\mathcal{P}_{\Theta^\perp}(\textbf{W}_2)  && \Theta \cap \Theta^\perp = \oslash
\end{align*}
\begin{align*}
\|\textbf{W}_1-\textbf{W}_2\|_F^2 &= \|\mathcal{P}_\Theta(\textbf{W}_1)- \mathcal{P}_\Theta(\textbf{W}_2)+\mathcal{P}_{\Theta^\perp}(\textbf{W}_1)- \mathcal{P}_{\Theta^\perp}(\textbf{W}_2 \|_F^2\\
&=\|\mathcal{P}_\Theta(\textbf{W}_1)- \mathcal{P}_\Theta(\textbf{W}_2)\|_F^2+\|\mathcal{P}_{\Theta^\perp}(\textbf{W}_1)- \mathcal{P}_{\Theta^\perp}(\textbf{W}_2 \|_F^2\\
&=\|\Lambda_k(\textbf{W}_1)-\Lambda_k(\textbf{W}_2))\|_F^2 + \|\mathcal{P}_{\Theta^\perp}(\textbf{W}_1)- \mathcal{P}_{\Theta^\perp}(\textbf{W}_2 \|_F^2\\
& \geq \|\Lambda_k(\textbf{W}_1)-\Lambda_k(\textbf{W}_2))\|_F^2
\end{align*}

\emph{\textbf{Lemma 4}}. The successive differences $\|\textbf{L}_t-\textbf{L}_{t-1}\|_F^2, \|\textbf{S}_t-\textbf{S}_{t-1}\|_F^2$ of the sequence $\textbf{L}_t, \textbf{S}_t$ are monotone decreasing:
\[\|\textbf{L}_{t+1}-\textbf{L}_t\|_F^2 \leq \|\textbf{L}_t-\textbf{L}_{t-1}\|_F^2 ~~~~ \forall t.\]
\[\|\textbf{S}_{t+1}-\textbf{S}_t\|_F^2 \leq \|\textbf{S}_t-\textbf{S}_{t-1}\|_F^2 ~~~~  \forall t.\]

\emph{Proof}. \begin{equation*}
\begin{split}
&\|\textbf{L}_{t+1}-\textbf{L}_t\|_F^2=\|\textbf{T}_\lambda(\textbf{X}-\textbf{S}_t)-\textbf{T}_\lambda(\textbf{X}-\textbf{S}_{t-1})  \|_F^2\\
&(by~ Lemma~ 3) \leq \|(\textbf{X}-\textbf{S}_t)-(\textbf{X}-\textbf{S}_{t-1}) \|_F^2\\
&~~~~~~~~~~~~~~~~~~~~~~=\|\textbf{S}_{t-1}-\textbf{S}_t\|_F^2\\
&~~~~~~~~~~~~~~~~~~~~~~=\|\Lambda_k(\textbf{X}-\textbf{L}_{t-1})-\Lambda_k(\textbf{X}-\textbf{L}_t)  \|_F^2\\
&(by~ Lemma~ 3) \leq \|\textbf{L}_t-\textbf{L}_{t-1}\|_F^2
\end{split}
\end{equation*}
In the same way for sequence $\textbf{S}_t$:
\begin{equation*}
\begin{split}
&\|\textbf{S}_{t+1}-\textbf{S}_t\|_F^2=\|\Lambda_k(\textbf{X}-\textbf{L}_{t+1})-\Lambda_k(\textbf{X}-\textbf{L}_t)  \|_F^2\\
&~~~~~~~~~~~~~~~~~~~~~~ \leq \|\textbf{L}_t-\textbf{L}_{t+1}\|_F^2\\
&~~~~~~~~~~~~~~~~~~~~~~=\|\textbf{T}_\lambda(\textbf{X}-\textbf{S}_{t-1})-\textbf{T}_\lambda(\textbf{X}-\textbf{S}_t)  \|_F^2\\
&~~~~~~~~~~~~~~~~~~~~~~ \leq \|\textbf{S}_t-\textbf{S}_{t-1}\|_F^2
\end{split}
\end{equation*}

The above implies that sequence ${\|\textbf{L}_t-\textbf{L}_{t-1}\|_F^2}$ and ${\|\textbf{S}_t-\textbf{S}_{t-1}\|_F^2}$ converge (since they are decreasing and bounded below). This implies that:
\[\|\textbf{L}_{t+1}-\textbf{L}_t\|_F^2-\|\textbf{L}_t-\textbf{L}_{t-1}\|_F^2 \rightarrow 0 ~~~as~~t \rightarrow \infty\]
\[\|\textbf{S}_{t+1}-\textbf{S}_t\|_F^2-\|\textbf{S}_t-\textbf{S}_{t-1}\|_F^2 \rightarrow 0 ~~~as~~t \rightarrow \infty\]

So there exist constants $\alpha_1 \geq 0, \alpha_2 \geq 0$
\[\|\textbf{L}_{t+1}-\textbf{L}_t\|_F^2 \rightarrow \alpha_1 ~~~as~~t \rightarrow \infty\]
\[\|\textbf{S}_{t+1}-\textbf{S}_t\|_F^2 \rightarrow \alpha_2 ~~~as~~t \rightarrow \infty\]


Actually, since LRSDec can be written as the form of alternating projections on two manifolds. According to \cite{lewis2008alternating}, $\textbf{L}_t$ converges asymptotically to some point $\textbf{L}_*$, $\textbf{S}_t$ converges linearly to some point $\textbf{S}_*$, for some constant $\alpha$, exists $\beta$:
\[\|\textbf{L}_t-\textbf{L}_*\|_F^2 \leq \alpha_1\beta_1^t\]
\[\|\textbf{S}_t-\textbf{S}_*\|_F^2 \leq \alpha_2\beta_2^t\]


\section{Figure S1. Hierarchical clustergram of all 552 genes in Section 6.2 with imputing missing values}

\begin{figure}[H]
\centering
\includegraphics[height=1\textwidth]{New-Cluster.pdf}
%\includegraphics[height=1\textwidth]{New-Cluster.eps}
\caption{Red and green represent positive and negative genetic interactions, respectively, grey entries in the original figure in (\cite{wilmes2008genetic}) have been imputed, whose the clustering results could be found more clearly here.}
\end{figure}


\newpage

%
\section{Calculation of \emph{p}-value for a gene set}

Let N be the total number of genes and M be the number of genes related to a functional category from the total genes. Suppose now we have a gene set with $N_1$ genes. Among these $N_1$ genes there are $M_1$ genes related to GO functional category. The \emph{p}-value of this gene set is given below:

\[p(N,M,N_1,M_1)=\sum\limits_{i=M_1}^{N_1} \frac{\left( \begin{array}{l}
M\\
i
\end{array} \right)\left( \begin{array}{l}
N-M\\
N-i
\end{array} \right)}{\left( \begin{array}{l}
N\\
N_1
\end{array} \right)}\]

The \emph{p}-value are adjusted using Bonferroni correction.


\section{Jaccard index: evaluation measure of the predicted modules}

The Jaccard index \cite{song2009and} between two sets $M_i$ and $B_j$ is defined as:
\begin{equation}
\frac{\sharp \{M_i \cap B_j\}}{\sharp \{M_i \cup B_j \}}
\end{equation}
where $\sharp$\{A\} denotes the number of set A
\\

%For module $M_i$, the Jaccard Index between $M_i$ and the benchmark gene sets is defined as the maximum of Jaccard Index between $M_i$ and any gene set in the benchmark:
For module $M_i$, the Jaccard index between $M_i$ and each gene set $B_j$ in the benchmark is computed, and the Jaccard index of $M_i$ and the benchmark gene sets is defined as the maximum of Jaccard index between $M_i$ and any gene set in the benchmark:
\begin{equation}
Jaccard ~Index(M_i,B)=max_j\{Jaccard Index(M_i,B_j)\}
\end{equation}

Thus, the average Jaccard index of the predicted modules and the benchmark gene sets can be computed as:
\begin{equation}
Jaccard ~Index(M,B)=\frac{\sum\limits_{i\in 1,...k}Jaccard ~Index(M_i, B)}{k}
\end{equation}

\section{Global view of the genetic crosstalk between different RNA-related complexes}

\begin{figure}[H]
\centering
\includegraphics[width=1\textwidth,resolution=600]{complexlljiang.pdf}
\caption{{\footnotesize Global view of the genetic crosstalk between different RNA-related complexes (GO CC FAT). Green and red represent a statistically significant enrichment of negative (genetic interaction score $[S] \leq -2.5$)and positive (genetic interaction score $[S]> 2.0$) interactions, respectively, whereas yellow corresponds to cases where there are roughly equal numbers of positive and negative genetic interactions. Nodes (balls) correspond to distinct protein complex, edges (lines) represent how the complexes are genetically connected. }}
\end{figure}

\section{Results in Strategy 2}
\begin{figure}[H]
\centering
\includegraphics[width=1\textwidth,resolution=600]{27-AEP.pdf}
\caption{{\footnotesize Global  }}
\end{figure}

\begin{figure}[H]
\centering
\includegraphics[width=0.9\textwidth,resolution=600]{71-LHP.pdf}
\caption{{\footnotesize Global  }}
\end{figure}

\begin{figure}[H]
\centering
\includegraphics[width=0.9\textwidth,resolution=600]{106-CUS.pdf}
\caption{{\footnotesize Global  }}
\end{figure}

\begin{figure}[H]
\centering
\includegraphics[width=0.9\textwidth,resolution=600]{123-ASM.pdf}
\caption{{\footnotesize Global  }}
\end{figure}


\section{Results in Synthetic data}

\begin{figure}[H]
\centering
\begin{minipage}[t]{\linewidth}
\ (a)
\includegraphics[width=0.5\textwidth,resolution=1200]{Err_rank_001e_L.pdf}\quad
%\includegraphics[width=5cm,resolution=1200]{Err_rank_L_2.pdf}\quad
\ (b)
\includegraphics[width=0.5\textwidth]{Err_rank_001e_S.pdf}\\

\end{minipage}
\\
\begin{minipage}[t]{1\linewidth}
\ (c)
\includegraphics[width=0.5\textwidth]{Err_card_001e_L.pdf}\quad
\ (d)
\includegraphics[width=0.5\textwidth]{Err_card_001e_S.pdf}\\

\end{minipage}
\\
\begin{minipage}[t]{\linewidth}
\ (e)
\includegraphics[width=0.5\textwidth,resolution=1200]{Err_rank_01e_L.pdf}\quad
%\includegraphics[width=5cm,resolution=1200]{Err_rank_L_2.pdf}\quad
\ (f)
\includegraphics[width=0.5\textwidth]{Err_rank_01e_S.pdf}\\

\end{minipage}
\\
\begin{minipage}[t]{1\linewidth}
\ (g)
\includegraphics[width=0.5\textwidth]{Err_card_01e_L.pdf}\quad
\ (h)
\includegraphics[width=0.5\textwidth]{Err_card_01e_S.pdf}\\

\end{minipage}

\caption{{\footnotesize Performances of LRSDec and GoDec in Low-Rank and Sparse decomposition tasks on synthetic data under different paramenters. (a)-(d): nosise $\textbf{e}=10^{-3} * \textbf{F}$, specially, (a)-(b): fixed parameter card, different parameter rank; (c)-(d): fixed parameter rank, different parameter card. And (e)-(h): nosise $\textbf{e}=10^{-1} * \textbf{F}$, specially, (e)-(f): fixed parameter card, different parameter rank; (g)-(h): fixed parameter rank, different parameter card. }}
\end{figure}

\section{Application to C.elegans}
Here we added the application of LRSDec algorithm to a genetic interaction dataset of Caenorhabditis elegans \cite{byrne2007global}. This dataset systematically tested genetic interactions between 11 `query' genes and 858 `target' genes. There are almost 20 \% missing entries in this one. We can also get the low-rank matrix and the sparse matrix, meanwhile impute the missing entries in the dataset. We presented the results of LRSDec on this dataset in the Supplementary. After the matrix decomposition of LRSDec we could found more functional gene clusters by estimated the clustering results with GO biological process category using the hypergeometric distribution. Then if people follow our strategy 1 and 2 in the paper, they could explore the functional pathways or complexes according to the annotation dataset of \emph{Caenorhabditis Elegans}. Furthermore, we could found more functional clusters than that in the original paper. Such as ``Regulation of signal transduction'', ``Cell cycle switching'', ``Positive regulation of cellular'' and so on.

\begin{table}[htp]
\caption{Clustering Results}
\begin{minipage}[t]{1\linewidth}
\centering
\begin{threeparttable}
\renewcommand{\arraystretch}{1.3}
\begin{tabular}{ccccccc}
\hline
&\multicolumn{6}{c}{low-rank matrix L~~~~~~~~~~~~~~~~~Original matrix}\\\cline{2-7}
%&\multicolumn{3}{c|}{Filter}\\\cline{2-4}
\raisebox{1.5ex}[0pt]{$\sharp$ Clusters} ~& JC-Index & {$\sharp$ Enriched$^@$}~~~ & JC-Index & {$\sharp$ Enriched$^@$}\\ \hline
9 & 0.146 & 9 & 0.112 & 9  \\
18 & 0.121 & 18 & 0.082 & 18 \\
\hline
\end{tabular}
\footnotesize @: hyper-geometric test applied to test the enrichment of  gene sets. Significance level :FDR$<=$0.05. $\sharp Cluster$: the number of clusters to cut off the hierarchical clustering tree. $\sharp Enriched$: the number of modules predicted by hierarchical clustering enriched in the GO iterms
\end{threeparttable}
\end{minipage}
\end{table}


\bibliographystyle{plain}
\bibliography{Low-Sparse_planlatex}


\end{document}
